# Supplementary material for: Effect of composition deviation on the microstructure and luminescence properties of Nd:YAG ceramics
Source: Royal Society of Chemistry journal article supplement (doi:10.1039/c4ce01757a), 2014-01-01
Supplement: c4ce01757a1.pdf [file c4ce01757a1.pdf]

## Effect of composition deviation on microstructure and luminescence property of Nd:YAG ceramics

Haiming Qin <sup>a,b</sup>, Jun Jiang <sup>a</sup>, Haochuan Jiang <sup>a</sup>, Yuanhua Sang <sup>b</sup>, Dehui Sun <sup>b</sup>, Xinhai Zhang <sup>c\*</sup>,  
Jiyang Wang <sup>b</sup>, Hong Liu <sup>b\*</sup>

<sup>a</sup> Ningbo Institute of Materials Technology and Engineering, Chinese Academy of Sciences,  
Ningbo, 315201, China

<sup>b</sup> State Key Laboratory of Crystal Materials, Shandong University, Jinan, 250100, China

<sup>c</sup> Department of Electrical and Electronic Engineering, South University of Science and  
Technology of China, Shenzhen, 518055, China

**\*Corresponding authors**

Hong Liu, Email: [hongliu@sdu.edu.cn](mailto:hongliu@sdu.edu.cn) Tel.: +86-531-88362807; Fax: +86-531-88362807

Xinhai Zhang, Email: [zhang.xh@sustc.edu.cn](mailto:zhang.xh@sustc.edu.cn) Tel.: +86-755-88018566

## Supplementary information

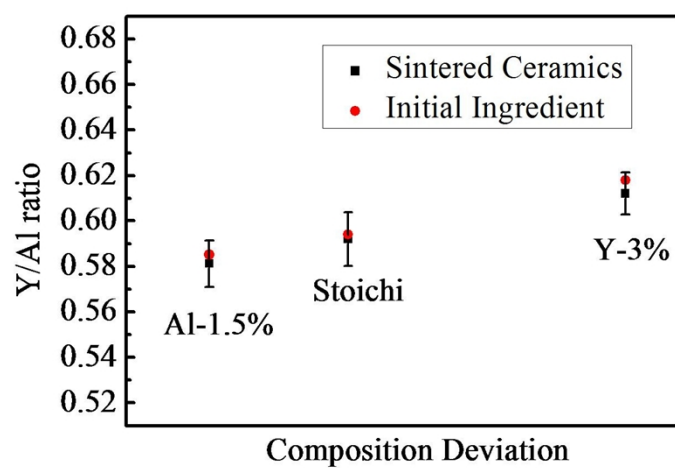

Figure S1. Y/Al molar ratio of selected sintered samples according to the characterization of inductively coupled plasma mass spectrometry

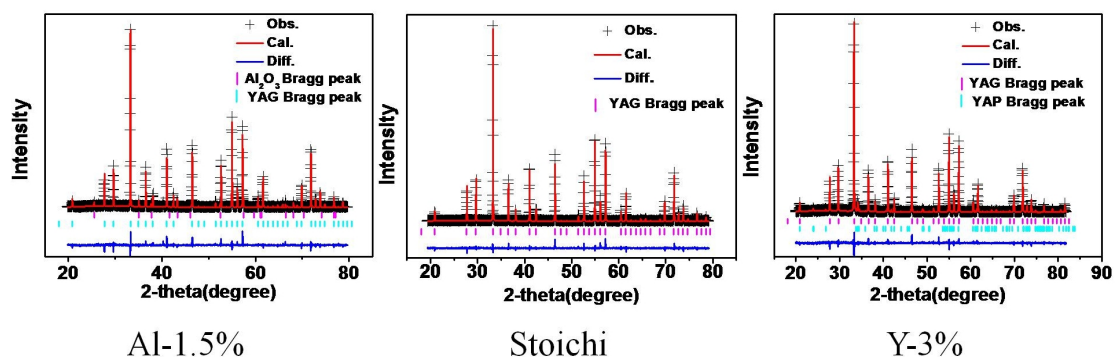

Figure S2. Rietveld refinement of the XRD patterns

Table R1. Components of selected samples calculated according to Rietveld refinement of the XRD patterns

| Sample                | Refined Composition (wt%)                                           | Calculated Y/Al Ratio (molar ratio) | Y/Al Ratio of Initial Ingredient (molar ratio) | GOF  | Rwp  |
|-----------------------|---------------------------------------------------------------------|-------------------------------------|------------------------------------------------|------|------|
| S3                    | Al <sub>2</sub> O <sub>3</sub> 0.61% (0.09%);<br>YAG 99.39% (0.19%) | 0.592                               | 0.585                                          | 1.40 | 6.2% |
| Stoichiometric Nd:YAG | YAG 100%                                                            | 0.600                               | 0.594                                          | 1.22 | 5.6% |
| Y3                    | YAG 93.3% (0.07%)<br>YAP 6.7% (0.13%)                               | 0.618                               | 0.612                                          | 1.38 | 7.4% |
